# Supplementary material for: Perfluorocarbons in the global atmosphere: tetrafluoromethane, hexafluoroethane, and octafluoropropane
Source: Copernicus journal article supplement (doi:10.5194/acp-10-5145-2010), 2010-06-09
Supplement: Supplementary file [file acp-10-5145-2010-supplement.pdf]

1086 **Supplement 1. PFC emissions from UNFCCC data**

1087 Perfluorocarbon (PFC) emissions are reported to UNFCCC by 34 Annex I countries as part of their obligations as signatories to the  
1088 Kyoto Protocol (UNFCCC, 2009). Emissions are reported for CF<sub>4</sub>, C<sub>2</sub>F<sub>6</sub>, C<sub>3</sub>F<sub>8</sub>, c-C<sub>4</sub>F<sub>8</sub>, C<sub>4</sub>F<sub>10</sub>, C<sub>5</sub>F<sub>12</sub> and C<sub>6</sub>F<sub>14</sub> in Gg for individual PFCs,  
1089 and total PFC emissions are reported in Gg (CO<sub>2</sub>-e, using the GWP<sub>100S</sub> (100-yr period) 6500 (CF<sub>4</sub>), 9200 (C<sub>2</sub>F<sub>6</sub>), 7000 (C<sub>3</sub>F<sub>8</sub>), 8700 (c-  
1090 C<sub>4</sub>F<sub>8</sub>), 7000 (C<sub>4</sub>F<sub>10</sub>), 7500 (C<sub>5</sub>F<sub>12</sub>), and 7400 (C<sub>6</sub>F<sub>14</sub>). Some countries also or solely (in particular the UK) report emissions of an  
1091 unspecified mix of PFCs in CO<sub>2</sub>-e. To derive total individual PFC emissions in any one year (T), the global total of unspecified PFC  
1092 emissions is assumed to contain the same PFC mix as the global total of specified PFC emissions in that year (S).

1093 Table S1 shows global emissions (in Gg) of specific PFCs as reported to UNFCCC (S), and total emissions (T) where any unspecified  
1094 mix of PFCs has been distributed according to the global total of specified PFC emissions. The UNFCCC data contain emissions from the  
1095 27 member countries of the European Community (EUC, Austria, Belgium, Bulgaria, Cyprus, Czech Republic, Denmark, Estonia,  
1096 Finland, France, Germany, Greece, Hungary, Ireland, Italy, Latvia, Lithuania, Luxembourg, Malta, Netherlands, Poland, Portugal,  
1097 Romania, Slovakia, Slovenia, Spain, Sweden, and the UK) as well as other individual European countries. The global totals reported  
1098 below contain emissions from all reporting countries and the EUC excluding individual countries which also report under the EUC sum.  
1099 Portugal, Ukraine and the UK (3) report total PFC emissions only. Australia, Austria, Belgium, Canada, Croatia, Czech Republic,  
1100 Denmark, Estonia, Finland, France, Germany, Greece, Hungary, Iceland, Ireland, Italy, Japan, Monaco, Netherlands, New Zealand,  
1101 Norway, Poland, Romania, Russia, Slovakia, Slovenia, Spain, Sweden, Switzerland, Turkey and the USA (31) report individual PFC  
1102 emissions. Austria, Finland, Germany, Japan, and the Netherlands (5) also report an unspecified PFC mix.

1103 **Table S1. PFC emission from UNFCCC (2009) data**

|                               | Year | 1990  | 1991  | 1992  | 1993  | 1994  | 1995  | 1996  | 1997  | 1998  | 1999  | 2000  | 2001  | 2002  | 2003  | 2004  | 2005  | 2006  |
|-------------------------------|------|-------|-------|-------|-------|-------|-------|-------|-------|-------|-------|-------|-------|-------|-------|-------|-------|-------|
| CF <sub>4</sub>               | S    | 8.58  | 7.86  | 7.16  | 6.77  | 6.19  | 6.16  | 6.31  | 6.04  | 5.87  | 5.74  | 5.59  | 4.63  | 4.47  | 4.08  | 3.86  | 3.8   | 3.6   |
|                               | T    | 9.34  | 8.7   | 7.99  | 7.9   | 7.71  | 7.93  | 8.15  | 8.05  | 7.52  | 7.06  | 6.79  | 5.65  | 5.37  | 4.95  | 4.78  | 4.66  | 4.43  |
| C <sub>2</sub> F <sub>6</sub> | S    | 1.27  | 1.18  | 1.11  | 1.1   | 1.06  | 1.03  | 1.07  | 1.03  | 1.03  | 1.03  | 0.93  | 0.78  | 0.81  | 0.72  | 0.67  | 0.64  | 0.64  |
|                               | T    | 1.38  | 1.3   | 1.23  | 1.29  | 1.33  | 1.32  | 1.38  | 1.37  | 1.32  | 1.26  | 1.14  | 0.95  | 0.98  | 0.88  | 0.83  | 0.79  | 0.78  |
| C <sub>3</sub> F <sub>8</sub> | S    | 0.025 | 0.024 | 0.026 | 0.026 | 0.03  | 0.036 | 0.041 | 0.043 | 0.035 | 0.021 | 0.046 | 0.049 | 0.044 | 0.06  | 0.046 | 0.046 | 0.049 |
|                               | T    | 0.027 | 0.026 | 0.029 | 0.03  | 0.037 | 0.046 | 0.054 | 0.058 | 0.045 | 0.025 | 0.055 | 0.06  | 0.053 | 0.073 | 0.057 | 0.057 | 0.06  |

1104

1105 **Supplement 2. CF<sub>4</sub> emissions from primary aluminum production**

1106 The International (Primary) Aluminium Institute (IAI) annually reports anode effect data to derive PFC emissions from the global  
1107 aluminum (Al) smelting industry, using data on Al production and PFC (CF<sub>4</sub> and C<sub>2</sub>F<sub>6</sub>) smelting technology-specific emission factors  
1108 (EF, Tier 1), emission coefficients (Tier 2) and, when available, facility-specific coefficients (Tier 3, confidential data) in their IAI Anode  
1109 Effect surveys (1996; 2000, 2001, 2003-2008, 2009b, a). IAI uses median technologies EF/coefficients to estimate emissions from non-  
1110 reporting facilities which currently produce ~40% of global Al (IAI, 2009a) and mainly use high performing Point Feed Prebake (PFPB)  
1111 technology. Until the mid-2000s Chinese Al production was dominated by Horizontal Stud Soderberg (HSS) technology, but through the  
1112 mid-2000s a transformation occurred and by the end of 2005 the China Non-Ferrous Metals Industry Association (CNIA) reported 100%  
1113 use of PFPB technology. It seemed reasonable to assume that the time-dependent Chinese CF<sub>4</sub> EF were the same as the average deduced  
1114 for PFPB smelters participating in the global IAI Anode Effect surveys (2009b, a) which declined from ~0.3 to ~0.04 kg/tonne Al from  
1115 1990 to 2006 (2009b). However, IAI recently found a median PFPB EF for 8 Chinese smelters 2.6 times larger than the global PFPB

1116 technology average (2009a). Assuming the Chinese EF is constant in time, revised CF<sub>4</sub> emissions were calculated for Chinese and global  
 1117 Al smelting from 2006 to 2008 (Table S2).

1118 **Table S2. CF<sub>4</sub> emissions from primary aluminum production**

|                                                                 | 1990  | 1995  | 1998  | 1999  | 2000  | 2001  | 2002  | 2003  | 2004  | 2005  | 2006  | 2007  | 2008  |
|-----------------------------------------------------------------|-------|-------|-------|-------|-------|-------|-------|-------|-------|-------|-------|-------|-------|
| 1. Global CF <sub>4</sub> emissions (Gg) <sup>a</sup>           | 11.4  | 7.39  | 7.70  | 7.69  | 7.10  | 4.71  | 5.00  | 4.50  | 4.60  | 3.46  | 3.19  | 3.41  | 3.37  |
| 2. Chinese aluminum production (Mt) <sup>b</sup>                |       |       |       | 2.60  | 2.79  | 3.37  | 4.32  | 5.55  | 6.69  | 7.81  | 9.35  | 12.6  | 13.1  |
| 3. PFPB CF <sub>4</sub> emission factor (kg/tonne) <sup>a</sup> | 0.310 | 0.097 | 0.080 | 0.091 | 0.080 | 0.080 | 0.061 | 0.053 | 0.047 | 0.038 | 0.038 | 0.038 | 0.038 |
| 4. Chinese CF <sub>4</sub> emissions (Gg) <sup>c</sup>          |       |       |       |       |       |       |       |       |       |       | 0.36  | 0.48  | 0.50  |
| 5. Global CF <sub>4</sub> emissions (excl. China) <sup>d</sup>  |       |       |       |       |       |       |       |       |       |       | 2.83  | 2.94  | 2.87  |
| 6. Revised Chinese CF <sub>4</sub> emissions (Gg) <sup>e</sup>  |       |       |       |       |       |       |       |       |       |       | 0.92  | 1.24  | 1.29  |
| 7. Revised global CF <sub>4</sub> emission (Gg) <sup>f</sup>    |       |       |       |       |       |       |       |       |       |       | 3.75  | 4.18  | 4.16  |

1119 <sup>a</sup>International (Primary) Aluminium Institute (1996; 2000, 2001, 2003-2008, 2009b, a)

1120 <sup>b</sup>International Aluminium Institute (IAI) <http://www.world-aluminium.org/Statistics/Historical+statistics>)

1121 <sup>c</sup>Chinese CF<sub>4</sub> emissions = Chinese aluminum production \* standard PFPB emission factor (= 2 \* 3)

1122 <sup>d</sup>Global CF<sub>4</sub> emissions (excl. China) = global – China (= 1 – 4)

1123 <sup>e</sup>Revised CF<sub>4</sub> Chinese emissions = Chinese CF<sub>4</sub> emissions \* 2.6 (= 4 \* 2.6)

1124 <sup>f</sup>Revised global CF<sub>4</sub> emissions = Global CF<sub>4</sub> emissions (excluding China) + Revised Chinese CF<sub>4</sub> emissions (= 5 + 6)

1125 **Supplement 3. Residuals and Measurement Uncertainty**

1126 **Figure S3. Residuals (Model – Observations) and Measurement Uncertainty (ppt)**

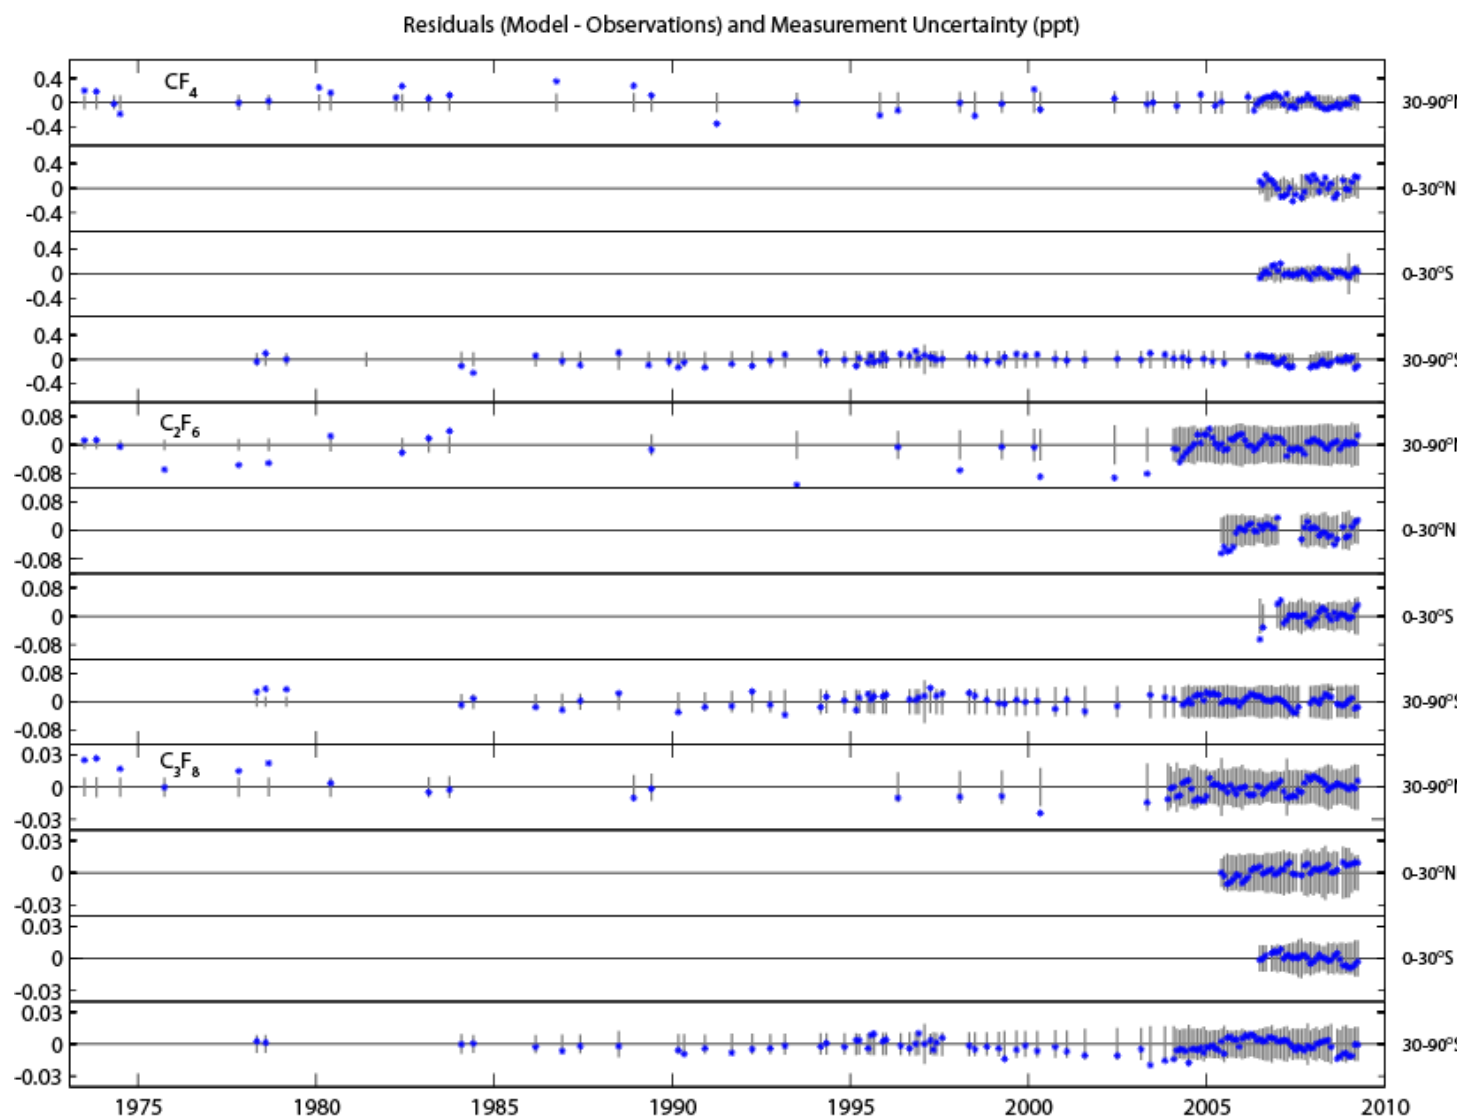

1127  
1128 Residuals as modeled minus observed mixing ratios (blue dots) vs. measurement uncertainty  
1129 (gray bars) for  $\text{CF}_4$ ,  $\text{C}_2\text{F}_6$ , and  $\text{C}_3\text{F}_8$  in each semi-hemispheric model box. Residuals are generally  
1130 smaller than the measurement uncertainty indicating that the derived emissions are consistent  
1131 with the measurements. Residuals that lie outside of the measurement uncertainty may have  
1132 occurred when the sampled air was not truly representative of the semi-hemispheric background.

1133
